# Supplementary material
Source: publisher figshare collection journal article supplement (https://karger.figshare.com/ndownloader/files/26446646)
Supplement: Supplementary file 1 [file 26446646]

Research strategy for PUBMED

(((((((((("Crohn's disease"[Text Word]) OR Crohn's Enteritis[MeSH Terms]) OR "Crohn's Enteritis"[Text Word]) OR Crohn's disease[MeSH Terms]) OR Crohns Disease[MeSH Terms]) OR Inflammatory Bowel Disease[MeSH Terms]) OR "Inflammatory Bowel Disease"[Text Word]) OR "Granulomatous Enteritis"[Text Word]) OR Granulomatous Enteritis[MeSH Terms])) AND ((((((((((((((((((("orofacial granulomatosis"[Text Word]) OR "Melkersson-Rosenthal Syndrome"[Text Word]) OR "cheilitis granulomatosa"[Text Word]) OR "Granulomatous Cheilitis"[Text Word]) OR Granulomatous Cheilitis[MeSH Terms]) OR "Melkersson Syndrome"[Text Word]) OR Melkersson Syndrome[MeSH Terms]) OR Syndrome, Melkerson Rosenthal[MeSH Terms]) OR Rosenthal Melkerson Syndrome[MeSH Terms]) OR Melkersson Rosenthal Miescher Syndrome[MeSH Terms]) OR Melkersson-Rosenthal-Miescher Syndrome[MeSH Terms]) OR "Melkerson-Rosenthal Syndrome"[Text Word]) OR "Melkerson Rosenthal Syndrome"[Text Word]) OR Melkerson Rosenthal Syndrome[MeSH Terms]) OR Melkerson-Rosenthal Syndrome[MeSH Terms]) OR "Melkersson Rosenthal Miescher Syndrome"[Text Word]) OR "Melkersson-Rosenthal-Miescher Syndrome"[Text Word]) OR cheilitis granulomatosa[MeSH Terms]) OR Melkersson-Rosenthal Syndrome[MeSH Terms])
